# Supplementary material for: Ultrasmall fluorescent nanoparticles derived from roast duck: their physicochemical characteristics and interaction with human serum albumin
Source: Royal Society of Chemistry journal article supplement (doi:10.1039/c8fo00178b), 2018-01-01
Supplement: c8fo00178b1.pdf [file c8fo00178b1.pdf]

## Supporting Information

### **Ultrasmall fluorescent nanoparticles derived from roast duck: their physicochemical characteristics and interaction with human serum albumin**

Shuang Cong,<sup>a, b</sup> Jingran Bi,<sup>a, b</sup> Xunyu Song,<sup>a, b</sup> Chenxu Yu,<sup>a, c</sup> Mingqian Tan<sup>a, b, \*</sup>

<sup>a</sup> *School of Food Science and Technology, National Engineering Research Center of Seafood, Dalian Polytechnic University, Qinggongyuan1, Ganjingzi District, Dalian 116034, Liaoning, China*

<sup>b</sup> *Engineering Research Center of Seafood of Ministry of Education of China, Dalian 116034, Liaoning, China*

<sup>c</sup> *Department of Agricultural and Biosystems Engineering, Iowa State University, Ames, IA 50011, USA*

\*Corresponding author (Tel & Fax: +86-411-86318657, E-mail: 2468750030@qq.com, ORCID: 0000000275350035)

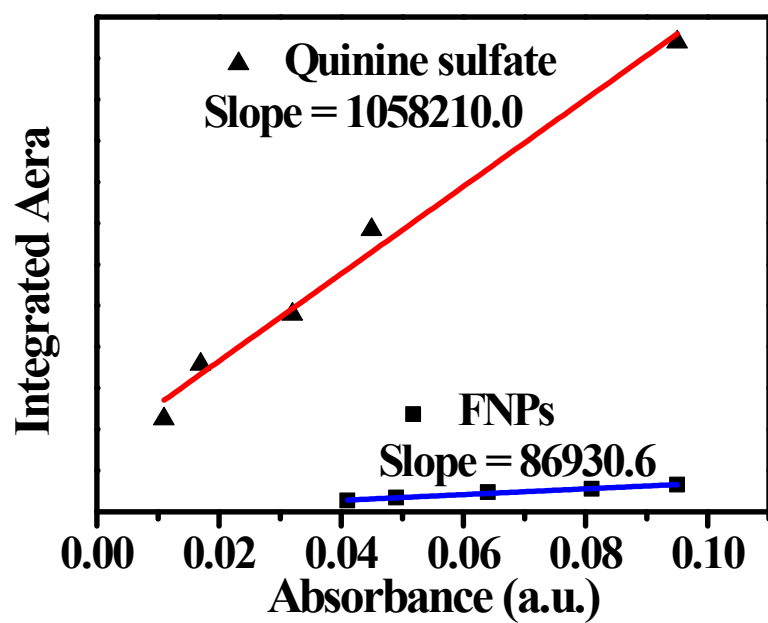

Fig. S1 Fluorescence quantum yield of FNPs from roast duck.

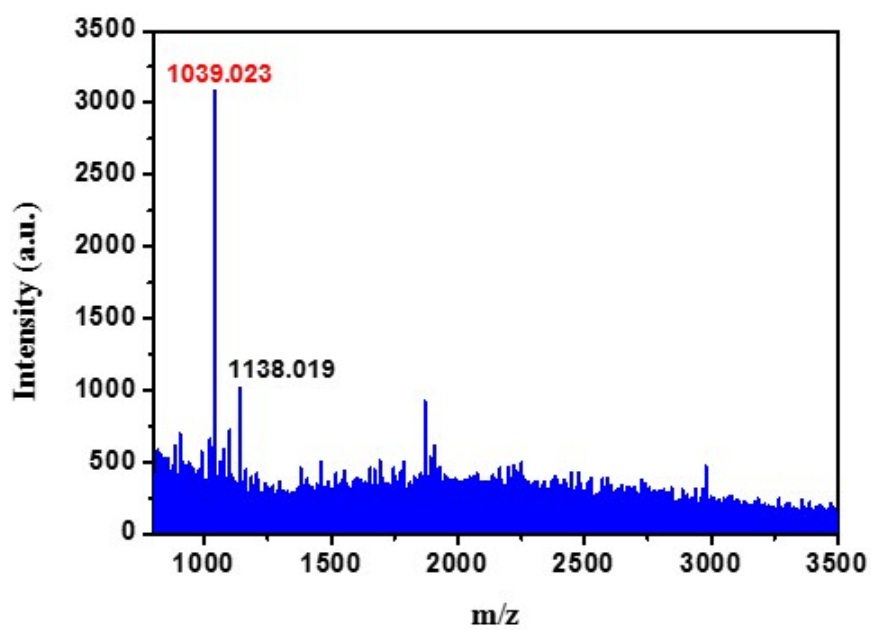

Fig. S2 MALDI-TOF-MS spectrum of FNPs from roast duck.

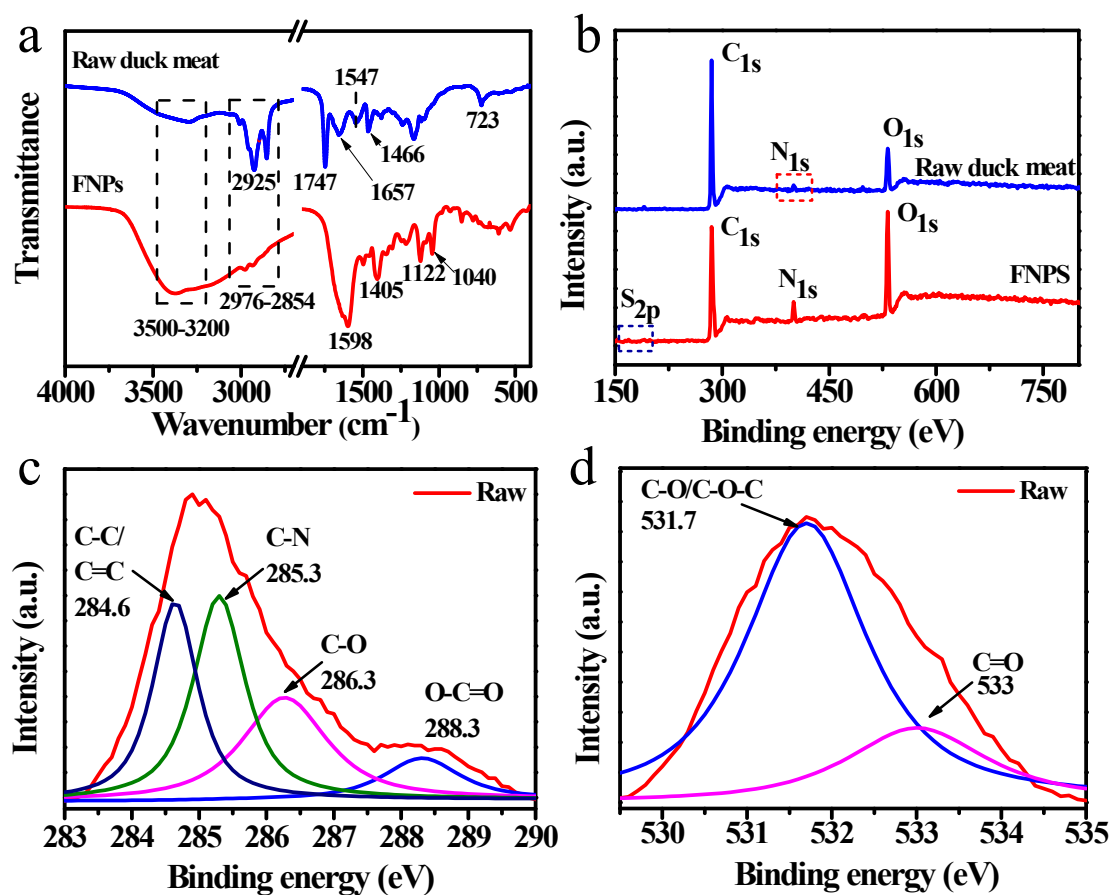

Fig. S3 (a) FT-IR and (b) XPS spectra of FNP and raw duck meat without roasting.

(c) High resolution peaks of  $\text{C}_{1s}$  and (d)  $\text{O}_{1s}$  for FNP.

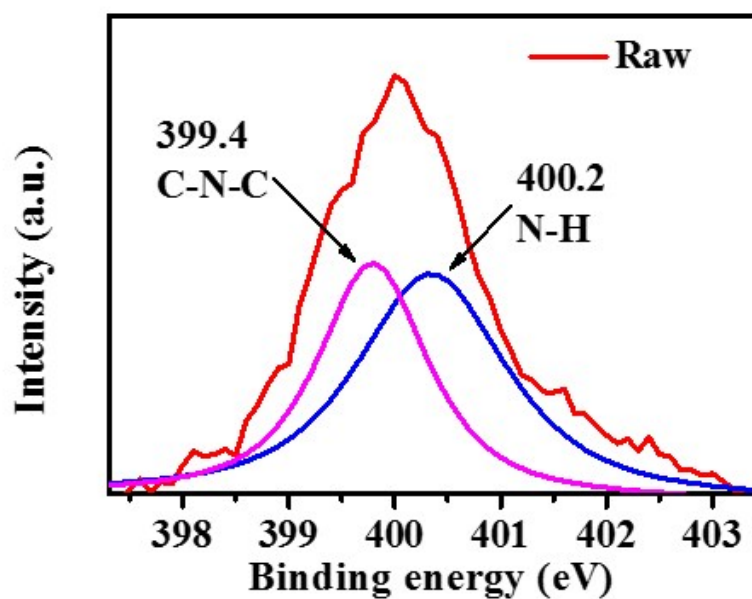

Fig. S4 High resolution spectra of N<sub>1s</sub> peak for FNP from roast duck.

Table S1 Element contents of raw duck meat and FNPs

| Elements | Raw duck meat (%) | FNPs (%) |
|----------|-------------------|----------|
| C        | 84.03             | 70.48    |
| N        | 2.48              | 6.25     |
| O        | 13.49             | 22.17    |
| S        | N.D.              | 1.11     |

N.D.: not detected.
